# Supplementary material for: Sonic Hedgehog-Gli1 Signaling and Cellular Retinoic Acid Binding Protein 1 Gene Regulation in Motor Neuron Differentiation and Diseases
Source: PubMed Central journal article supplement (PMC7312406; doi:10.3390/ijms21114125), 2020-06-09
Supplement: ijms-21-04125-s001.pdf [file ijms-21-04125-s001.pdf]

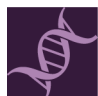

1 *Article*

2 **Sonic hedgehog-Gli1 signaling and cellular retinoic**  
3 **acid binding protein 1 gene regulation in motor**  
4 **neuron differentiation and diseases**

5 **Yu-Lung Lin<sup>1#</sup>, Yi-Wei Lin<sup>1#</sup>, Jennifer Nhieu<sup>1#</sup>, Xiaoyin Zhang<sup>1</sup>, and Li-Na Wei<sup>1\*</sup>**

6

7 <sup>1</sup>Department of Pharmacology, University of Minnesota, Minneapolis, MN, 55455, USA; yllin@umn.edu  
8 (Y.L.L.); linxx637@umn.edu (Y.W.L.); nhieu001@umn.edu (J.N.); zhan6240@umn.edu (X.Z.)

9 \* Correspondence: [weixx009@umn.edu](mailto:weixx009@umn.edu) (L.N.W.); Tel: +1-612-6259402

10 <sup>#</sup> Contributed equally

11

11 **Supplementary data**

12

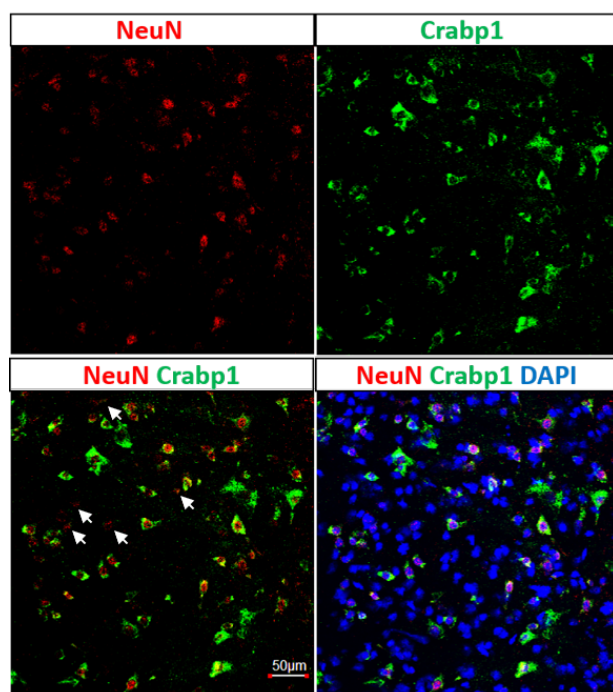

13

14 **Supplementary Figure 1. Crabp1 expression in spinal neurons.** Confocal  
15 microscopy images showing signals of CRABP1 (Green), general neuronal marker  
16 NeuN (Red), and cell nuclei (DAPI). White arrows mark NeuN+/Crabp1- cells,  
17 indicating subsets of Crabp1-negative spinal neurons. Scale bar = 50  $\mu$ m.

18

19

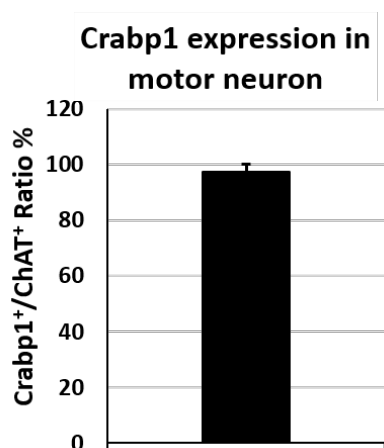

20

21 **Supplementary Figure 2. Quantification of Crabp1-positive spinal motor**  
22 **neurons.** Data of Fig. 1b, from multiple sections, are quantified to determine the  
23 ratio of Crabp1+/ChAT+ cells in the lumbar spinal section, N = 4. The result is  
24 presented as means  $\pm$  SEM. The result shows that greater than 95% of spinal motor  
25 neurons are Crabp1-positive.
